# Supplementary material for: Spatial distribution of environmental indicators in surface sediments of Lake Bolshoe Toko, Yakutia, Russia
Source: Copernicus journal article supplement (doi:10.5194/bg-16-4023-2019), 2019-10-18
Supplement: Supplementary file 1 [file bg-16-4023-2019-supplement.zip]

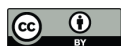

## *Supplement of*

# **Spatial distribution of environmental indicators in surface sediments of Lake Bolshoe Toko, Yakutia, Russia**

**Boris K. Biskaborn et al.**

*Correspondence to:* Boris K. Biskaborn ([boris.biskaborn@awi.de](mailto:boris.biskaborn@awi.de))

- [bg-16-4023-2019-supplement-title-page.pdf](#)
- [Bisk\\_ESM\\_rev2.docx](#)

The copyright of individual parts of the supplement might differ from the CC BY 4.0 License.
